# Supplementary material for: “Green” gold nanotriangles: synthesis, purification by polyelectrolyte/micelle depletion flocculation and performance in surface-enhanced Raman scattering
Source: Royal Society of Chemistry journal article supplement (doi:10.1039/c6ra04808k), 2016-01-01
Supplement: c6ra04808k1.pdf [file c6ra04808k1.pdf]

## SUPPLEMENTARY PART

### FIGURES

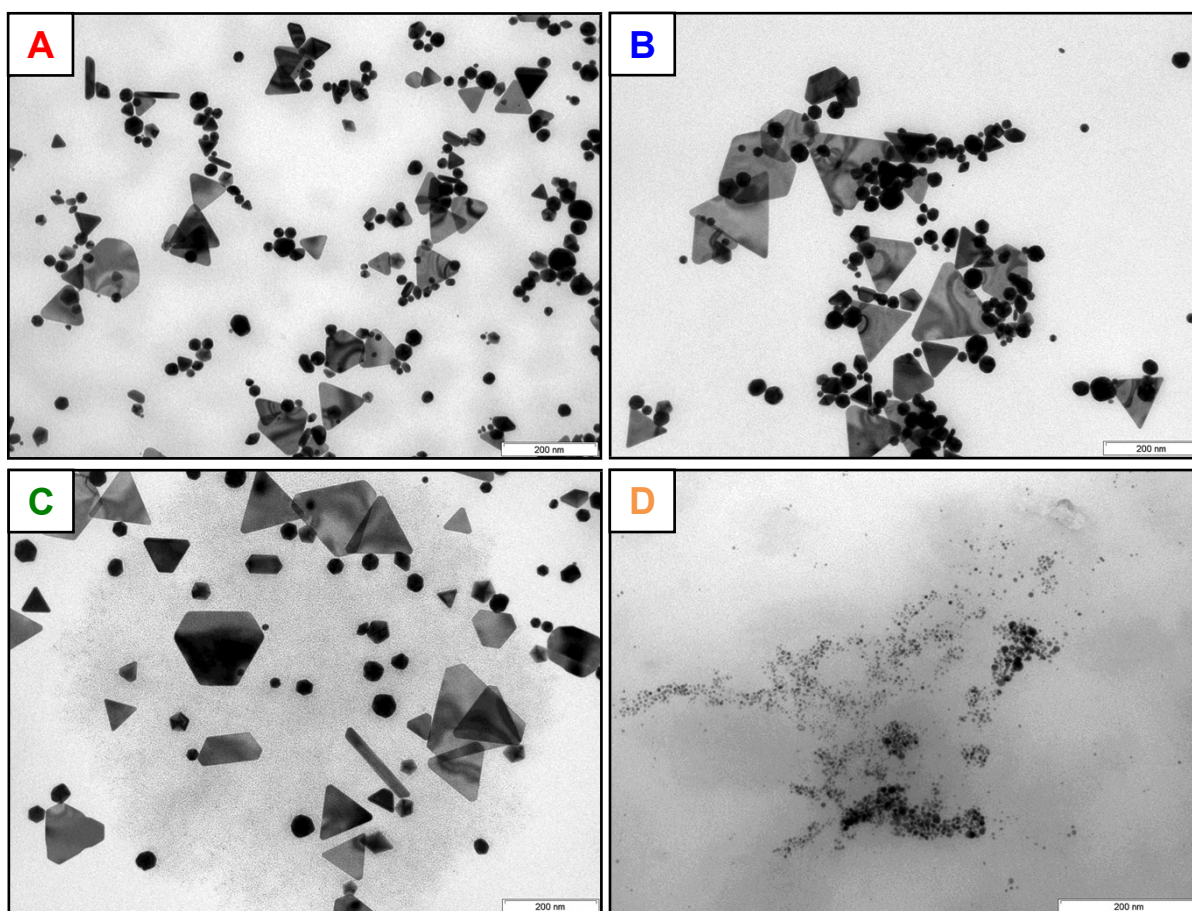

**Fig. S1** TEM micrographs of the gold nanoparticles formed in the template phase in presence of PalPhBisCarb (A), PAA (B), AlgA (C) and PDADMAC (D)

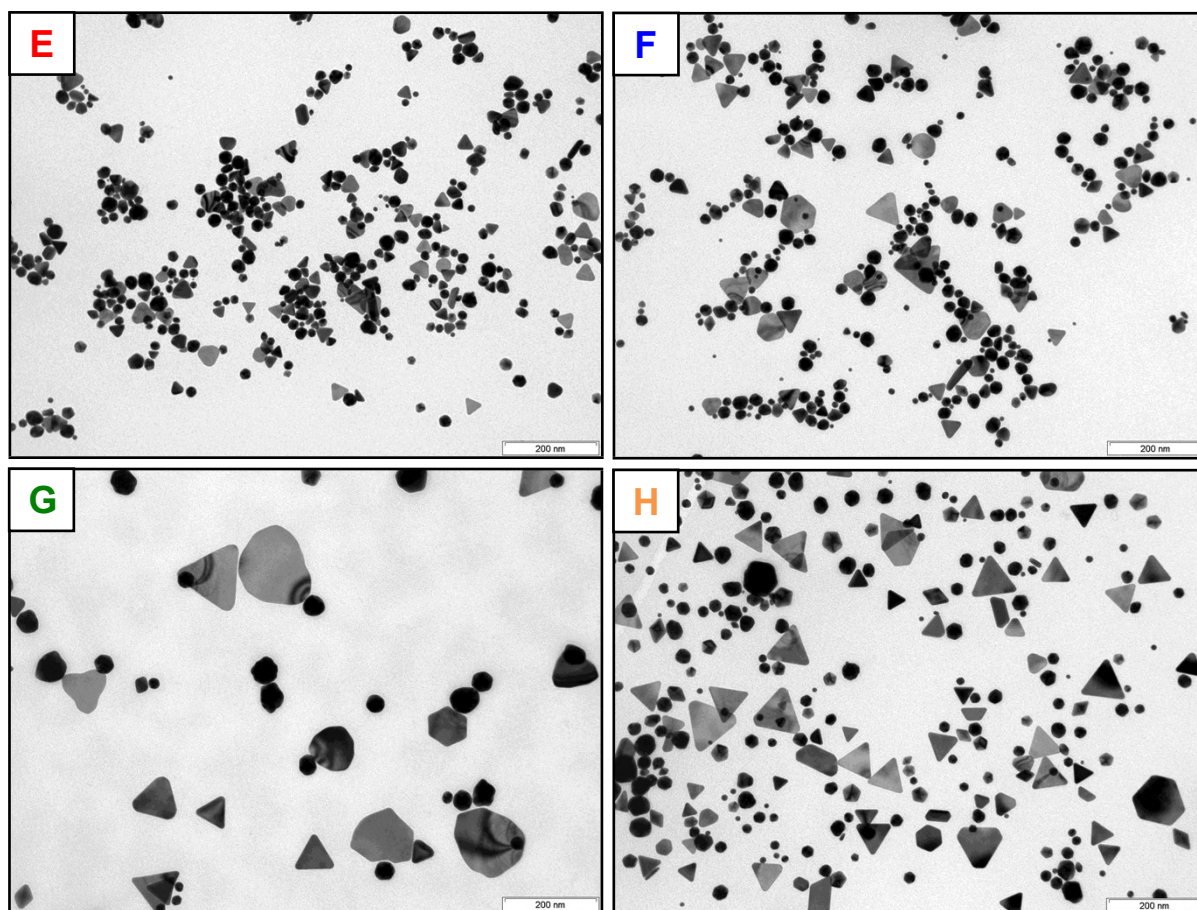

**Fig. S2** TEM micrographs of the gold nanoparticles formed in the template phase in presence of L-ascorbic acid (E), sodium citrate (F), L-lactic acid (G) and lemon grass oil (H)

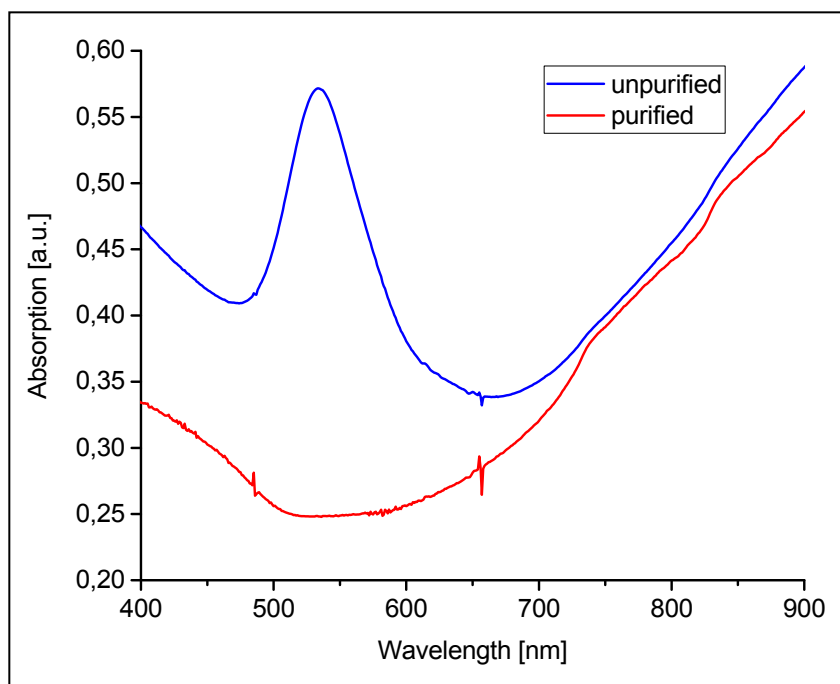

**Fig. S3** UV-vis absorption spectra before separation and after three purification steps
